# Supplementary material for: Biologically Active Compounds of Tomato Fruits Affected by Application of Spirulina, Dunaliella and Chlorella Microalgae Extracts
Source: Preprints.org preprint supplement (doi:10.20944/preprints202408.0180.v1), 2024-08-02
Supplement: Supplementary file 2 [file supplementary]

Table 3. Connections between fruits mass and taste index in tomato fruits.

| Plant material                            | Tomato fruit mass, g |         |         |       | Taste index |
|-------------------------------------------|----------------------|---------|---------|-------|-------------|
|                                           | Average<br>$p=0.673$ | Minimum | Maximum | S.D.  |             |
| Drinking water                            | 92.49 <sup>a</sup>   | 43.05   | 200.01  | 44.81 | 0.31        |
| Control, ethanol,<br>2% v/v               | 95.11 <sup>a</sup>   | 45.08   | 170.00  | 40.47 | 0.38        |
| Control, ethanol,<br>4% v/v               | 115.21 <sup>a</sup>  | 37.89   | 325.76  | 67.09 | 0.34        |
| <i>Spirulina</i> sp. extract,<br>10% v/v  | 101.66 <sup>a</sup>  | 39.25   | 185.73  | 46.71 | 0.57        |
| <i>Spirulina</i> sp. extract,<br>20% v/v  | 116.15 <sup>a</sup>  | 40.34   | 213.28  | 47.77 | 0.54        |
| <i>Dunaliella</i> sp. extract,<br>10% v/v | 129.33 <sup>a</sup>  | 55.71   | 273.75  | 68.08 | 0.37        |
| <i>Dunaliella</i> sp. extract,<br>20% v/v | 102.52 <sup>a</sup>  | 39.45   | 218.00  | 59.36 | 0.39        |
| <i>Chlorella</i> sp. extract,<br>10% v/v  | 94.85 <sup>a</sup>   | 34.7    | 188.75  | 48.63 | 0.33        |
| <i>Chlorella</i> sp. extract,<br>20% v/v  | 104.78 <sup>a</sup>  | 55.27   | 195.21  | 42.02 | 0.33        |

\*Values, marked with the same letter, are not significantly different ( $p>0.05$ ;  $\alpha=0.05$ ).  
S.D. standard deviation.
