# Supplementary material for: Biologically Active Compounds of Tomato Fruits Affected by Application of Spirulina, Dunaliella and Chlorella Microalgae Extracts
Source: Preprints.org preprint supplement (doi:10.20944/preprints202408.0180.v1), 2024-08-02
Supplement: Supplementary file 3 [file supplementary]

**Table 2.** *Anthocyanins and total phenols in tomato fruits.*

| <b>Plant material</b>                  | <b>Anthocyanins</b><br>mg 100 g <sup>-1</sup><br>(in fresh matter) | <b>Total phenols</b><br>mg 100 g <sup>-1</sup><br>(in fresh matter) |
|----------------------------------------|--------------------------------------------------------------------|---------------------------------------------------------------------|
| Drinking water                         | 0.42 ± 0.04 <sup>a</sup>                                           | 166.93 ± 2.01 <sup>c</sup>                                          |
| Control, ethanol, 2% v/v               | 0.09 ± 0.01 <sup>a</sup>                                           | 137.59 ± 1.34 <sup>a</sup>                                          |
| Control, ethanol, 4% v/v               | 0.07 ± 0.01 <sup>a</sup>                                           | 142.21 ± 1.53 <sup>ab</sup>                                         |
| <i>Spirulina</i> sp. extract, 10% v/v  | 0.12 ± 0.02 <sup>a</sup>                                           | 144.21 ± 1.87 <sup>ab</sup>                                         |
| <i>Spirulina</i> sp. extract, 20% v/v  | 0.11 ± 0.01 <sup>a</sup>                                           | 142.23 ± 1.33 <sup>ab</sup>                                         |
| <i>Dunaliella</i> sp. extract, 10% v/v | 0.14 ± 0.02 <sup>a</sup>                                           | 142.22 ± 2.02 <sup>ab</sup>                                         |
| <i>Dunaliella</i> sp. extract, 20% v/v | 0.09 ± 0.01 <sup>a</sup>                                           | 143.33 ± 1.22 <sup>ab</sup>                                         |
| <i>Chlorella</i> sp. extract, 10% v/v  | 0.11 ± 0.01 <sup>a</sup>                                           | 145.96 ± 2.04 <sup>ab</sup>                                         |
| <i>Chlorella</i> sp. extract, 20% v/v  | 0.12 ± 0.01 <sup>a</sup>                                           | 145.49 ± 2.25 <sup>ab</sup>                                         |

\*Values, marked with the same letter, are not significantly different ( $p > 0.05$ ;  $\alpha = 0.05$ ).
