# Supplementary material for: Biologically Active Compounds of Tomato Fruits Affected by Application of Spirulina, Dunaliella and Chlorella Microalgae Extracts
Source: Preprints.org preprint supplement (doi:10.20944/preprints202408.0180.v1), 2024-08-02

Tomatoes (*Solanum lycopersicum* L.)

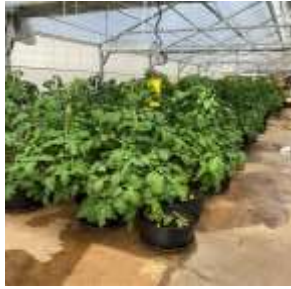

Treatment of tomatoes

Control

Drinking  
water

Control,  
ethanol,  
2% v/v

Control,  
ethanol,  
4% v/v

Microalgae extracts

*Spirulina* sp.  
extract,  
10% v/v

*Spirulina* sp.  
extract,  
20% v/v

*Dunaliella* sp.  
extract, 10% v/v

*Dunaliella* sp.  
extract,  
10% v/v

*Chlorella* sp.  
extract,  
10% v/v

*Chlorella* sp.  
extract,  
10% v/v

Quality evaluation

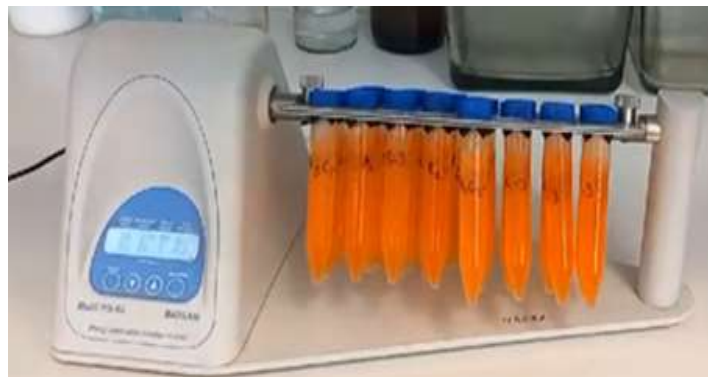

Supplement: Supplementary file 5 [file supplementary]
