# Supplementary material for: Biologically Active Compounds of Tomato Fruits Affected by Application of Spirulina, Dunaliella and Chlorella Microalgae Extracts
Source: Preprints.org preprint supplement (doi:10.20944/preprints202408.0180.v1), 2024-08-02
Supplement: Supplementary file 6 [file supplementary]

**Table 1.** Quality parameters of analyzed tomato fruits.

| <b>Plant material</b>                  | <b>Vitamin C</b><br>mg 100 g <sup>-1</sup><br>(in fresh matter) | <b>Titrateable acidity</b><br>g 100 g <sup>-1</sup><br>(in fresh matter) | <b>pH</b>                  |
|----------------------------------------|-----------------------------------------------------------------|--------------------------------------------------------------------------|----------------------------|
| Drinking water                         | 17.96 ± 0.89 <sup>a</sup>                                       | 0.33 ± 0.02 <sup>a</sup>                                                 | 4.21 ± 0.14 <sup>a</sup>   |
| Control, ethanol, 2% v/v               | 16.32 ± 0.64 <sup>a</sup>                                       | 0.45 ± 0.03 <sup>a</sup>                                                 | 4.24 ± 0.11 <sup>abc</sup> |
| Control, ethanol, 4% v/v               | 15.68 ± 0.56 <sup>a</sup>                                       | 0.31 ± 0.03 <sup>a</sup>                                                 | 4.25 ± 0.14 <sup>bc</sup>  |
| <i>Spirulina</i> sp. extract, 10% v/v  | 16.17 ± 0.98 <sup>a</sup>                                       | 0.32 ± 0.02 <sup>a</sup>                                                 | 4.23 ± 0.16 <sup>ab</sup>  |
| <i>Spirulina</i> sp. extract, 20% v/v  | 15.68 ± 0.94 <sup>a</sup>                                       | 0.27 ± 0.02 <sup>a</sup>                                                 | 4.22 ± 0.10 <sup>a</sup>   |
| <i>Dunaliella</i> sp. extract, 10% v/v | 18.55 ± 0.74 <sup>a</sup>                                       | 0.28 ± 0.01 <sup>a</sup>                                                 | 4.25 ± 0.15 <sup>bc</sup>  |
| <i>Dunaliella</i> sp. extract, 20% v/v | 17.21 ± 0.58 <sup>a</sup>                                       | 0.25 ± 0.02 <sup>a</sup>                                                 | 4.25 ± 0.10 <sup>bc</sup>  |
| <i>Chlorella</i> sp. extract, 10% v/v  | 17.47 ± 0.82 <sup>a</sup>                                       | 0.32 ± 0.03 <sup>a</sup>                                                 | 4.30 ± 0.11 <sup>d</sup>   |
| <i>Chlorella</i> sp. extract, 20% v/v  | 15.47 ± 0.83 <sup>a</sup>                                       | 0.28 ± 0.01 <sup>a</sup>                                                 | 4.27 ± 0.12 <sup>c</sup>   |

\*Titrateable acidity expressed as g 100 g<sup>-1</sup> of citric acid.

\*Values, marked with the same letter, are not significantly different ( $p>0.05$ ;  $\alpha=0.05$ ).
