# Supplementary figures and images for: Biologically Active Compounds of Tomato Fruits Affected by Application of Spirulina, Dunaliella and Chlorella Microalgae Extracts
Source: Preprints.org preprint supplement (doi:10.20944/preprints202408.0180.v1), 2024-08-02

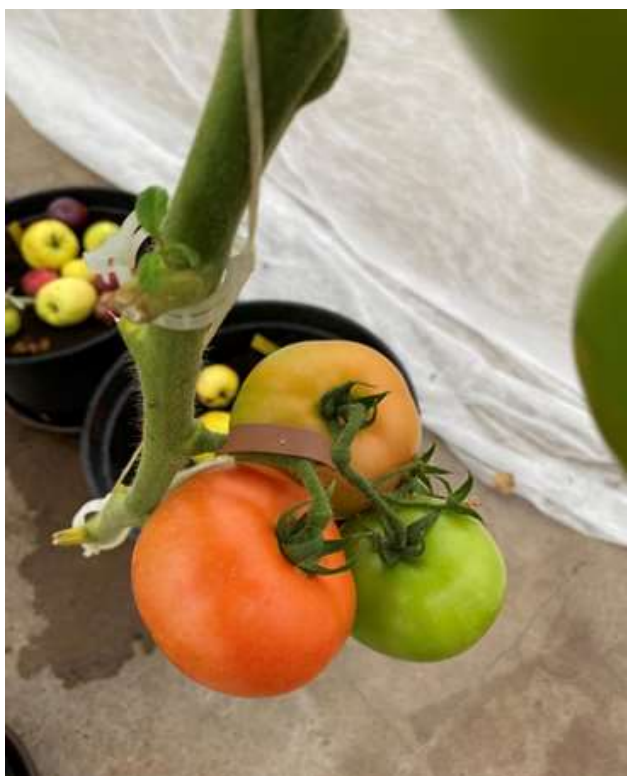

Supplement: Supplementary file 1 [file supplementary]

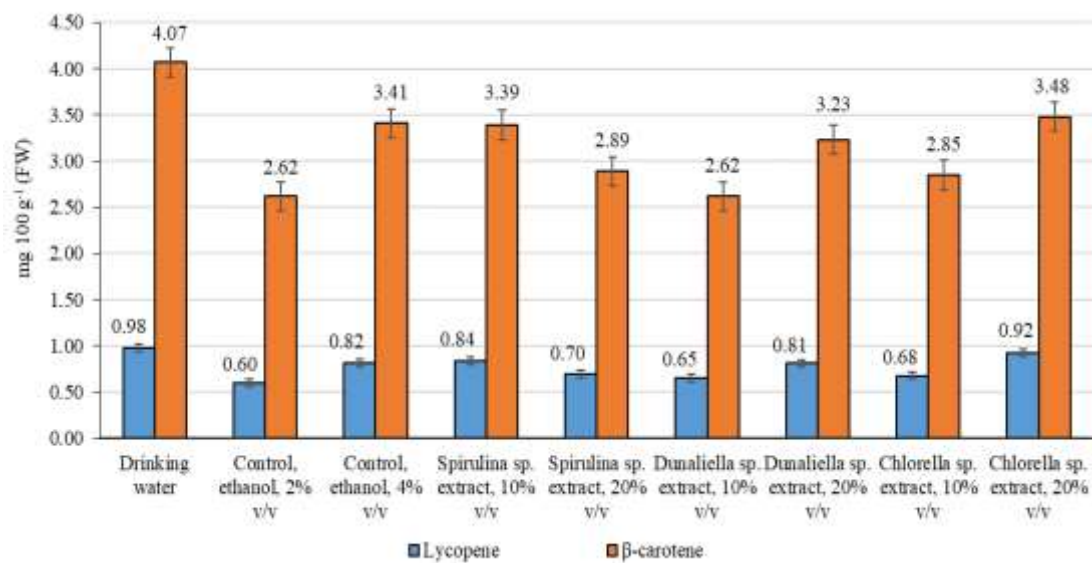

Figure 3. Lycopene and  $\beta$ -carotene content in tomato fruits.

Supplement: Supplementary file 4 [file supplementary]

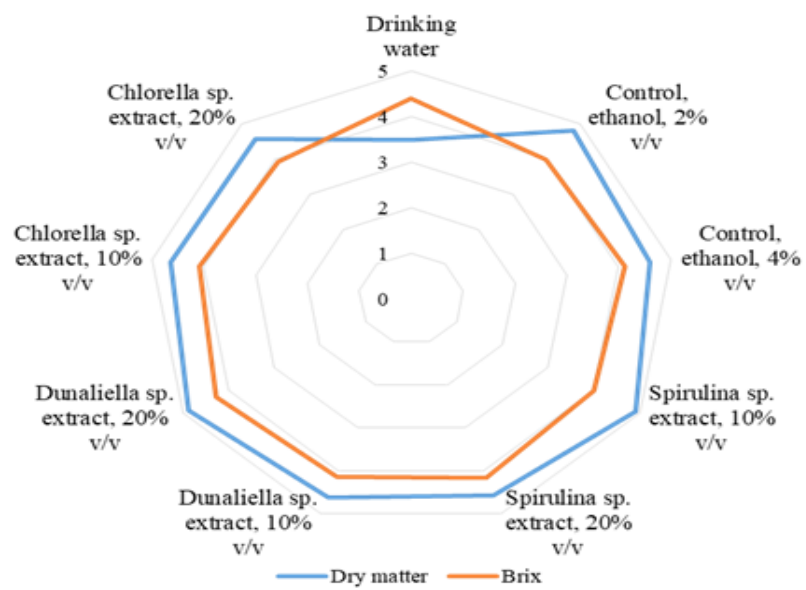

Figure 4. Content of dry matter (%) and total soluble solids (°Brix) in tomato fruits.

Supplement: Supplementary file 7 [file supplementary]
